# Supplementary material for: Migration and Proliferation Effects of Thymoquinone-Loaded Nanostructured Lipid Carrier (TQ-NLC) and Thymoquinone (TQ) on In Vitro Wound Healing Models
Source: Hindawi journal article supplement (doi:10.1155/2019/9725738), 2019-11-29
Supplement: f1 [file 9725738.f1.pdf]

Supplementary material.

A

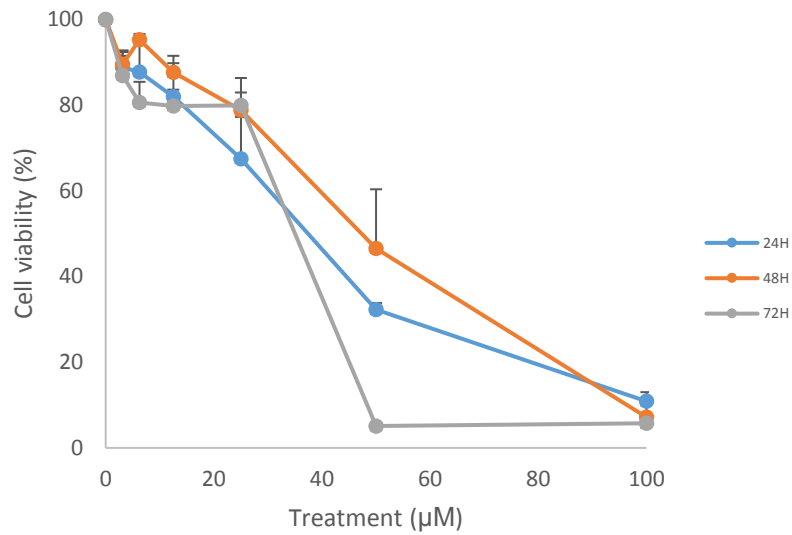

B

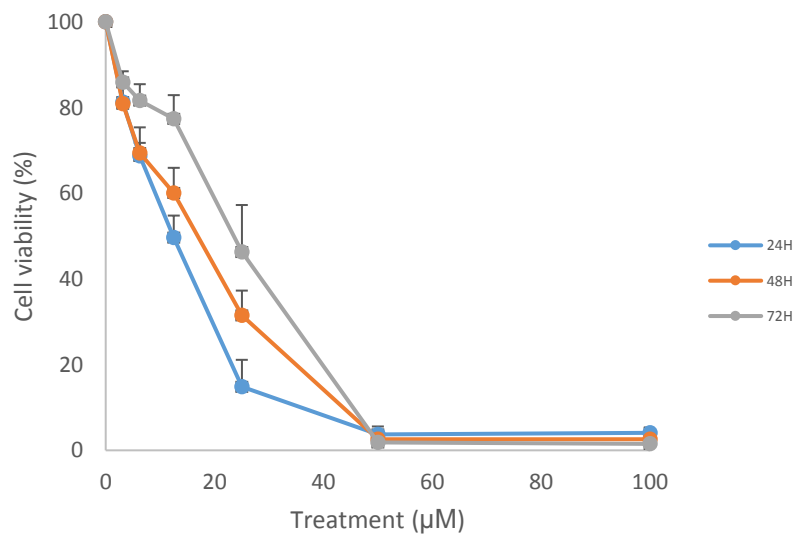

Figure 7. Dose-response curve of (A) TQ and (B) TQ-NLC of 3T3 fibroblast cells. (A) TQ treated on 3T3 cells and (B) TQ-NLC treated on 3T3 cells following treatment after 24 h, 48 h and 72 h as determined by MTT assay. The data are presented as mean  $\pm$  SEM.

A

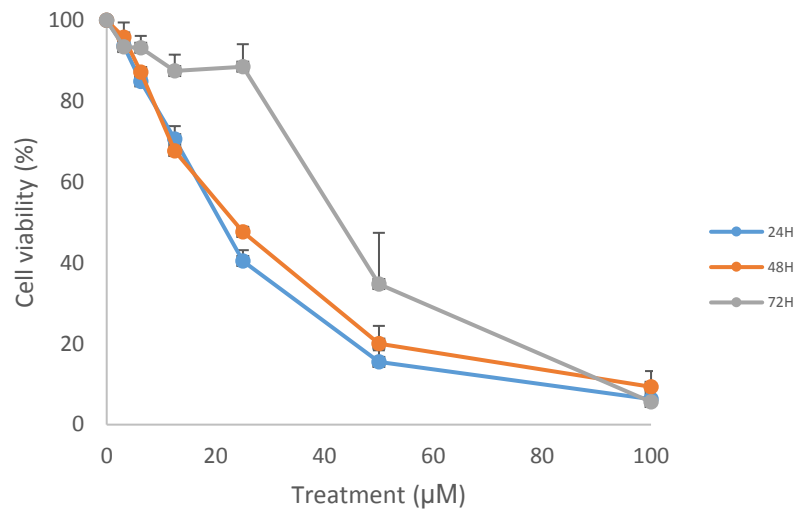

B

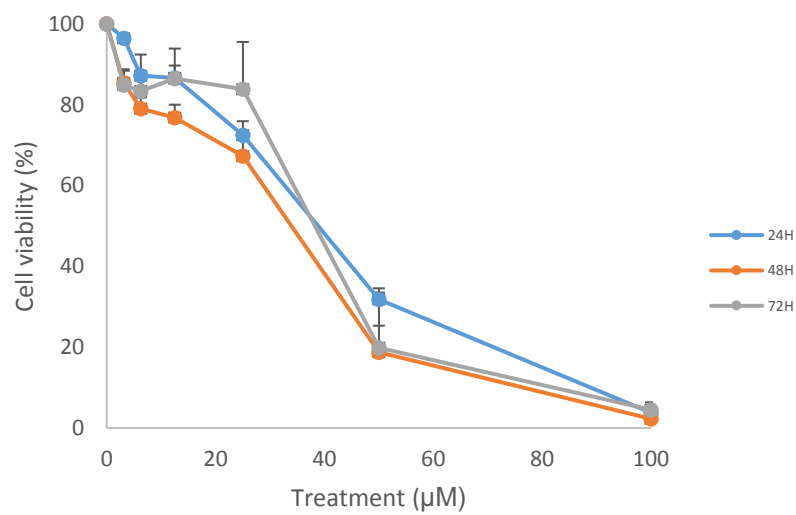

Figure 8. Dose-response curve of (A) TQ and (B) TQ-NLC of 3T3-L1 fibroblast cells. (A) TQ treated on 3T3-L1 cells and (B) TQ-NLC treated on 3T3-L1 cells following treatment after 24 h, 48 h and 72 h as determined by MTT assay. The data are presented as mean  $\pm$  SEM.
